# Supplementary material for: Stress promotes RNA G-quadruplex folding in human cells
Source: PubMed Central journal article supplement (PMC9839774; doi:10.1038/s41467-023-35811-x), 2023-01-13
Supplement: 41467_2023_35811_MOESM3_ESM.pdf [file 41467_2023_35811_MOESM3_ESM.pdf]

## Reporting Summary

Nature Portfolio wishes to improve the reproducibility of the work that we publish. This form provides structure for consistency and transparency in reporting. For further information on Nature Portfolio policies, see our [Editorial Policies](#) and the [Editorial Policy Checklist](#).

### Statistics

For all statistical analyses, confirm that the following items are present in the figure legend, table legend, main text, or Methods section.

n/a Confirmed

- The exact sample size ( $n$ ) for each experimental group/condition, given as a discrete number and unit of measurement
- A statement on whether measurements were taken from distinct samples or whether the same sample was measured repeatedly
- The statistical test(s) used AND whether they are one- or two-sided  
*Only common tests should be described solely by name; describe more complex techniques in the Methods section.*
- A description of all covariates tested
- A description of any assumptions or corrections, such as tests of normality and adjustment for multiple comparisons
- A full description of the statistical parameters including central tendency (e.g. means) or other basic estimates (e.g. regression coefficient) AND variation (e.g. standard deviation) or associated estimates of uncertainty (e.g. confidence intervals)
- For null hypothesis testing, the test statistic (e.g.  $F$ ,  $t$ ,  $r$ ) with confidence intervals, effect sizes, degrees of freedom and  $P$  value noted  
*Give  $P$  values as exact values whenever suitable.*
- For Bayesian analysis, information on the choice of priors and Markov chain Monte Carlo settings
- For hierarchical and complex designs, identification of the appropriate level for tests and full reporting of outcomes
- Estimates of effect sizes (e.g. Cohen's  $d$ , Pearson's  $r$ ), indicating how they were calculated

*Our web collection on [statistics for biologists](#) contains articles on many of the points above.*

### Software and code

Policy information about [availability of computer code](#)

**Data collection** Provide a description of all commercial, open source and custom code used to collect the data in this study, specifying the version used OR state that no software was used.

**Data analysis** Provide a description of all commercial, open source and custom code used to analyse the data in this study, specifying the version used OR state that no software was used.

For manuscripts utilizing custom algorithms or software that are central to the research but not yet described in published literature, software must be made available to editors and reviewers. We strongly encourage code deposition in a community repository (e.g. GitHub). See the Nature Portfolio [guidelines for submitting code & software](#) for further information.

### Data

Policy information about [availability of data](#)

All manuscripts must include a [data availability statement](#). This statement should provide the following information, where applicable:

- Accession codes, unique identifiers, or web links for publicly available datasets
- A description of any restrictions on data availability
- For clinical datasets or third party data, please ensure that the statement adheres to our [policy](#)

All data are available in the main text or the supplementary materials. Source data are provided as a supplementary file and DMS-seq data are deposited in Gene Expression Omnibus (GEO) under the accession (GSE200706).

## Field-specific reporting

Please select the one below that is the best fit for your research. If you are not sure, read the appropriate sections before making your selection.

Life sciences       Behavioural & social sciences       Ecological, evolutionary & environmental sciences

For a reference copy of the document with all sections, see [nature.com/documents/nr-reporting-summary-flat.pdf](https://www.nature.com/documents/nr-reporting-summary-flat.pdf)

## Life sciences study design

All studies must disclose on these points even when the disclosure is negative.

|                 |                                                                                                                                                                                                                                                                |
|-----------------|----------------------------------------------------------------------------------------------------------------------------------------------------------------------------------------------------------------------------------------------------------------|
| Sample size     | at least 3 independent experiments.                                                                                                                                                                                                                            |
| Data exclusions | No data exclusion.                                                                                                                                                                                                                                             |
| Replication     | 3 repeats.                                                                                                                                                                                                                                                     |
| Randomization   | Cells were randomly allocated into control or treatment groups.                                                                                                                                                                                                |
| Blinding        | Blinding was not relevant in this project because non of the experiments conducted produce information that may influence the researchers conducting the experiments and the previous conclusion was necessary for the researchers to continue on the project. |

## Reporting for specific materials, systems and methods

We require information from authors about some types of materials, experimental systems and methods used in many studies. Here, indicate whether each material, system or method listed is relevant to your study. If you are not sure if a list item applies to your research, read the appropriate section before selecting a response.

### Materials & experimental systems

### Methods

- n/a Involved in the study
- Antibodies
- Eukaryotic cell lines
- Palaeontology and archaeology
- Animals and other organisms
- Human research participants
- Clinical data
- Dual use research of concern

- n/a Involved in the study
- ChIP-seq
- Flow cytometry
- MRI-based neuroimaging

## Antibodies

|                 |                                                                                                                                                                          |
|-----------------|--------------------------------------------------------------------------------------------------------------------------------------------------------------------------|
| Antibodies used | BG4 antibody (absolute antibodies, cat# Ab00174-10.6), Cy™2 AffiniPure Donkey Anti-Mouse IgG (H+L) (Jackson laboratories, cat# 715-22S-150), Cy3-conjugated Streptavidin |
| Validation      | secondary antibody (Jackson laboratories, cat# 016-160-084), and mouse-anti His-tag antibody, His-Tag Antibody (AD1.1.1 O) (SantaCruz, Cat# sc-53073)                    |

Validation data available from the respective companies.

## Eukaryotic cell lines

Policy information about [cell lines](#).

|                                                                      |                                                                                                                                                 |
|----------------------------------------------------------------------|-------------------------------------------------------------------------------------------------------------------------------------------------|
| Cell line source(s)                                                  | U2OS cells from ATCC, COS7 cells from ATCC                                                                                                      |
| Authentication                                                       | Authentication data was provided by ATCC during the time of purchase, however no additional validation was done before running the experiments. |
| Mycoplasma contamination                                             | Cells tested negative for mycoplasma.                                                                                                           |
| Commonly misidentified lines<br>(See <a href="#">ICLAC</a> register) | No such cell lines were used.                                                                                                                   |
